# Supplementary material for: Theoretical exploration of novel boron–carbon clathrate in Sr(B,C)10 at high pressure
Source: Royal Society of Chemistry journal article supplement (doi:10.1039/d4tc00689e), 2024-01-01
Supplement: d4tc00689e1.pdf [file d4tc00689e1.pdf]

## Supporting Information

Dandan Zhang<sup>a,1</sup>, Yangfan Cui<sup>b,1</sup>, Miao Zhang<sup>c,\*</sup>, Xin Chen<sup>b,\*</sup> and Hui Wang<sup>a,\*</sup>

<sup>a</sup>Key Laboratory for Photonic and Electronic Bandgap Materials (Ministry of Education), School of Physics and Electronic Engineering, Harbin Normal University, Harbin 150025, China

<sup>b</sup>Laboratory of High-Pressure Physics and Material Science (HPPMS), School of Physics and Physical Engineering, Qufu Normal University, Qufu, Shandong 273165, China

<sup>c</sup>Department of Physics, School of Sciences, Beihua University, Jilin 132013, China.

<sup>1</sup>These authors contribute equally

\*E-mail addresses: zhangmiaolmc@126.com; chenxin@qfnu.edu.cn; wh@fysik.cn

### Contents

1. Computational details.
2. The COHP curves and ELF distributions.
3. The phonon dispersion curves.
4. The electronic band structure, transport properties and  $ZT$  values for  $\text{SrB}_8\text{C}_2$  at 20 GPa.
5. The detailed structure information and the possible synthesis pathways for  $\text{SrB}_5\text{C}_5$ ,  $\text{SrB}_7\text{C}_3$ ,  $\text{SrB}_8\text{C}_2$  and  $\text{SrB}_9\text{C}$ .
6. The calculated elastic constants, Bader charges for  $\text{SrB}_7\text{C}_3$ ,  $\text{SrB}_8\text{C}_2$  and  $\text{SrB}_9\text{C}$ .
7. The effective mass, elastic constant, DP constant and relaxation time for  $\text{SrB}_8\text{C}_2$ .

### 1. Computational details

We have extensively explored the structures of  $\text{SrB}_x\text{C}_{10-x}$  ( $x=1-9$ ) at pressures of 0-20 GPa. The formation enthalpy is defined as  $\Delta H/11 = H(\text{SrB}_x\text{C}_{10-x}) - H(\text{Sr}) - xH(\text{B}) - (10-x)H(\text{C})$  in unit of eV/atom.  $H(\text{SrB}_x\text{C}_{10-x})$  is the enthalpy of  $\text{SrB}_x\text{C}_{10-x}$ .  $H(\text{Sr})$ ,  $H(\text{B})$  and  $H(\text{C})$  are the enthalpies of elemental Sr, B and C solids, respectively. The  $Fm-3m$  and  $Im-3m$  phases of elemental Sr (phase transition pressure is 5.7 GPa), the  $R-3m$  phase of elemental B and the  $Fd-3m$  structure of elemental C are used in the calculation. In addition, the  $C2/m$  and  $P6_3/mmc$  SrB (phase transition pressure is 7.3 GPa),  $Immm$   $\text{SrB}_2$ ,  $R-3m$   $\text{SrB}_4$ ,  $Pm-3m$   $\text{SrB}_6$ ,  $I4/mmm$  and  $C2/m$   $\text{SrC}_2$  (phase transition pressure is 6.3 GPa) are used to calculate the synthesis pathways. All DFT-GGA calculations were performed for  $\text{SrB}_5\text{C}_5$ ,  $\text{SrB}_7\text{C}_3$ ,  $\text{SrB}_8\text{C}_2$ , and  $\text{SrB}_9\text{C}$  compounds with atoms numbers of 11, 22, 44, and 44, respectively, which are primitive cells.

## 2. The COHP curves and ELF distributions.

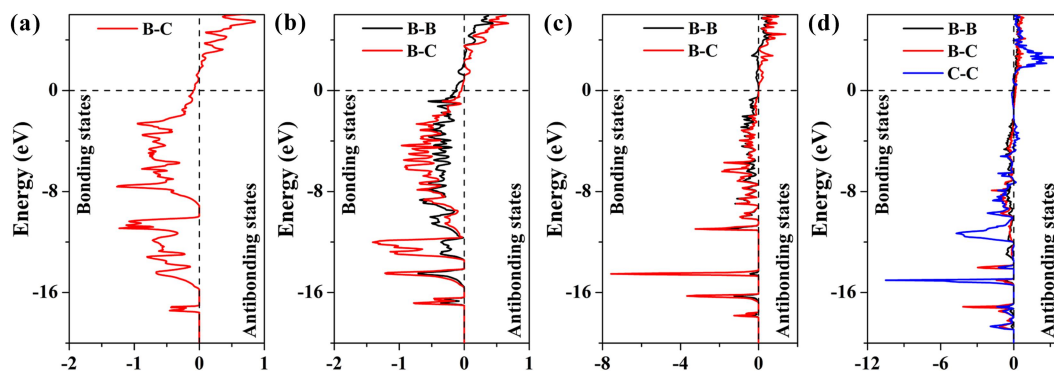

**Fig. S1** The COHP curves at 0 GPa for (a)  $\text{SrB}_5\text{C}_5$ , (b)  $\text{SrB}_7\text{C}_3$  and (d)  $\text{SrB}_9\text{C}$  using PBE functional, and (c)  $\text{SrB}_8\text{C}_2$  by HSE06 functional.

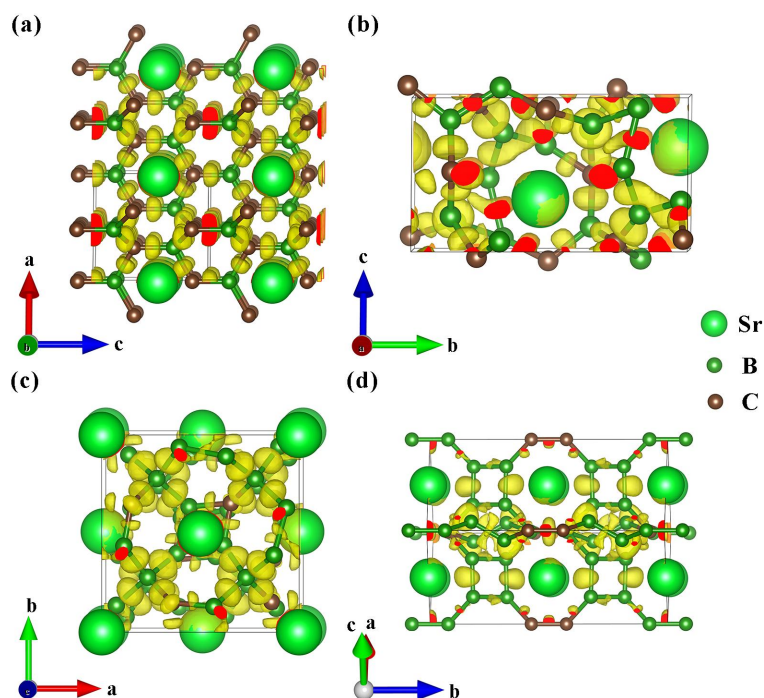

**Fig. S2** The ELF distributions for (a)  $\text{SrB}_5\text{C}_5$ , (b)  $\text{SrB}_7\text{C}_3$ , (c)  $\text{SrB}_8\text{C}_2$  and (d)  $\text{SrB}_9\text{C}$  at ambient pressure (The yellow isosurface represents an ELF value of 0.80).

### 3. The phonon dispersion curves.

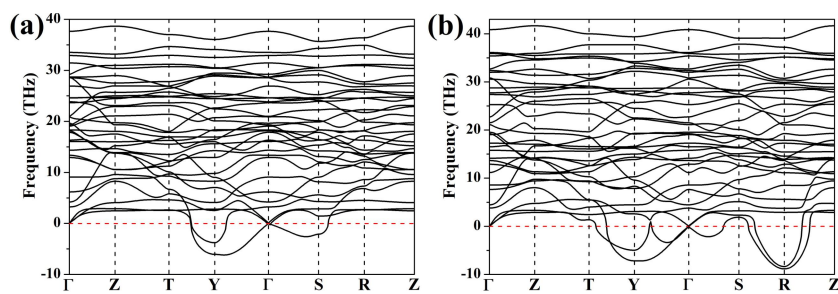

Fig. S3 The phonon dispersion curves for SrB<sub>5</sub>C<sub>5</sub> at (a) 0 GPa and (b) 20 GPa.

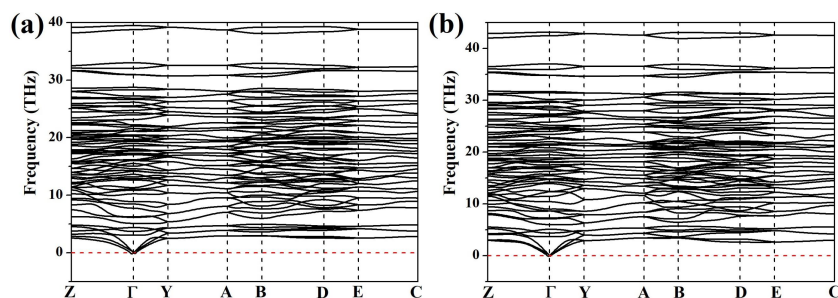

Fig. S4 The phonon dispersion curves for SrB<sub>7</sub>C<sub>3</sub> at (a) 0 GPa and (b) 20 GPa.

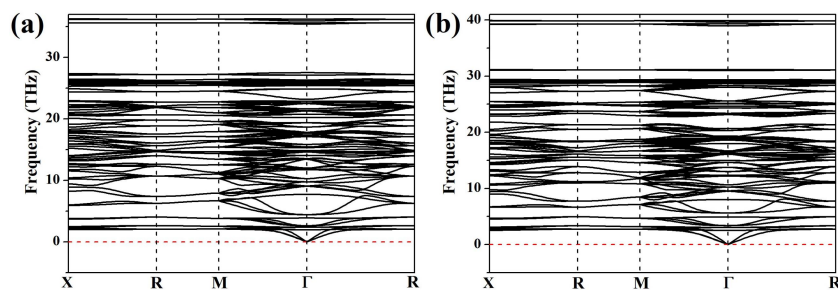

Fig. S5 The phonon dispersion curves for SrB<sub>8</sub>C<sub>2</sub> at (a) 0 GPa and (b) 20 GPa.

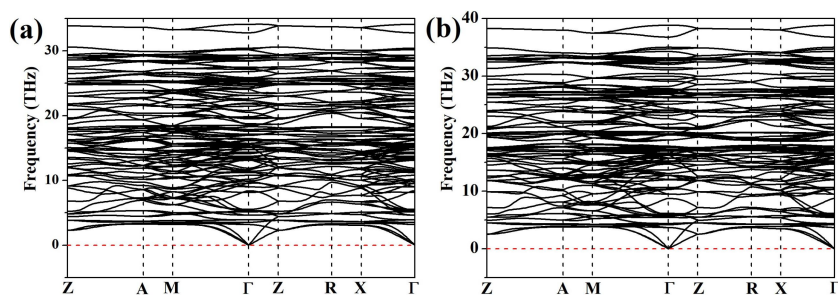

Fig. S6 The phonon dispersion curves for SrB<sub>9</sub>C at (a) 0 GPa and (b) 20 GPa.

#### 4. The electronic band structure, transport properties and $ZT$ values for $\text{SrB}_8\text{C}_2$ at 20 GPa.

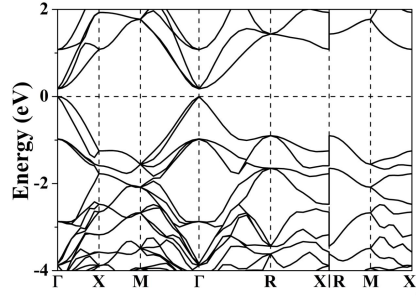

**Fig. S7** The electronic band structure of  $\text{SrB}_8\text{C}_2$  calculated by HSE06 functional at 20 GPa (the bandgap is 0.17 eV, and this value is used to calculate the transport properties).

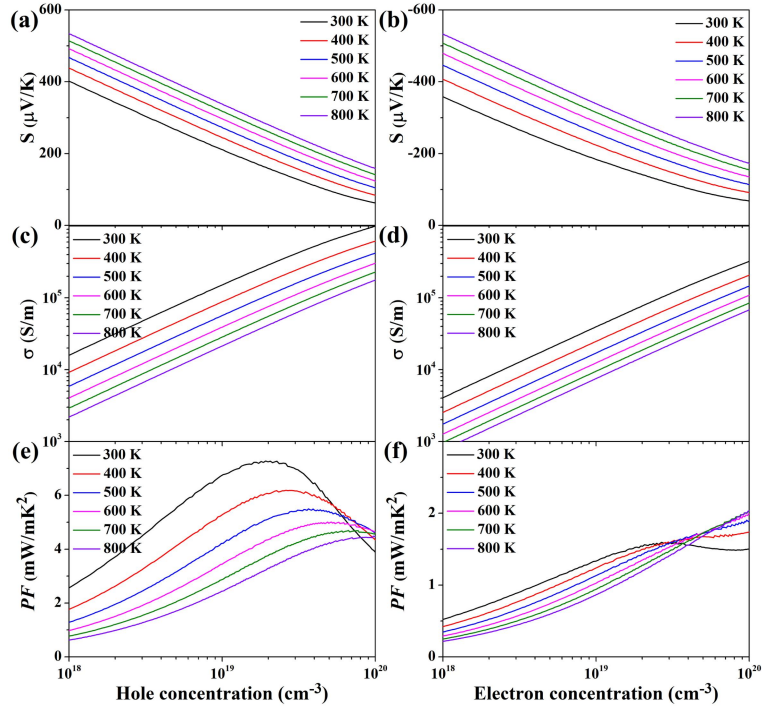

**Fig. S8** The transport properties of  $\text{SrB}_8\text{C}_2$  as a function of carrier concentration between 300 and 800 K at 20 GPa. (a, b) Seebeck coefficients, (c, d) electrical conductivity and (e, f) power factor.

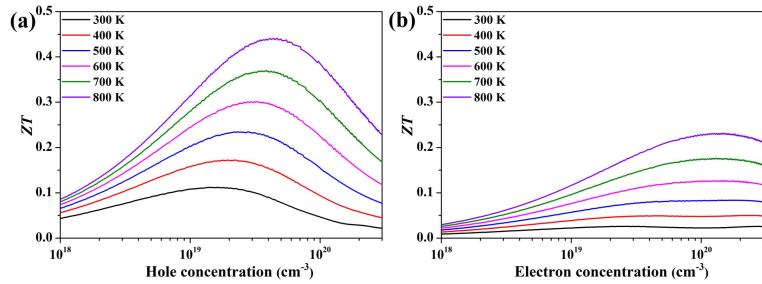

**Fig. S9** The (a)  $p$ -type and (b)  $n$ -type  $ZT$  values for  $\text{SrB}_8\text{C}_2$  between 300 and 800 K at 20 GPa.

**5. The detailed structure information and the possible synthesis pathways for SrB<sub>5</sub>C<sub>5</sub>, SrB<sub>7</sub>C<sub>3</sub>, SrB<sub>8</sub>C<sub>2</sub> and SrB<sub>9</sub>C.**

**Table S1** Detailed crystal structure information for SrB<sub>5</sub>C<sub>5</sub>, SrB<sub>7</sub>C<sub>3</sub>, SrB<sub>8</sub>C<sub>2</sub> and SrB<sub>9</sub>C at ambient pressure.

|                                        | Space group           | Volume per unit      | Lattice parameters                                                                                                                        | Atomic positions                        |
|----------------------------------------|-----------------------|----------------------|-------------------------------------------------------------------------------------------------------------------------------------------|-----------------------------------------|
| SrB <sub>5</sub> C <sub>5</sub>        | <i>Cmm2</i>           | 100.0 Å <sup>3</sup> | $a = 8.109 \text{ \AA}$ ,<br>$b = 5.173 \text{ \AA}$<br>$c = 4.766 \text{ \AA}$<br>$\alpha = \beta = \gamma = 90.0^\circ$                 | Sr 2 <i>a</i> (0,0,0.58356)             |
|                                        |                       |                      |                                                                                                                                           | B 4 <i>c</i> (0.25,0.25,0.19784)        |
|                                        |                       |                      |                                                                                                                                           | B 2 <i>b</i> (0,0.5,0.20458)            |
|                                        |                       |                      |                                                                                                                                           | B 4 <i>d</i> (0.67644,0,0.71311)        |
|                                        |                       |                      |                                                                                                                                           | C 4 <i>c</i> (0.25,0.25,0.8757)         |
|                                        |                       |                      |                                                                                                                                           | C 2 <i>b</i> (0,0.5,0.8801)             |
|                                        |                       |                      |                                                                                                                                           | C 4 <i>d</i> (0.67653,0,0.36699)        |
| SrB <sub>7</sub> C <sub>3</sub>        | <i>P2<sub>1</sub></i> | 95.3 Å <sup>3</sup>  | $a = 5.114 \text{ \AA}$<br>$b = 8.216 \text{ \AA}$<br>$c = 4.898 \text{ \AA}$<br>$\alpha = \gamma = 90.0^\circ$<br>$\beta = 112.12^\circ$ | Sr 2 <i>a</i> (0.59367,0.46204,0.33407) |
|                                        |                       |                      |                                                                                                                                           | B 2 <i>a</i> (0.79982,0.6514,0.82655)   |
|                                        |                       |                      |                                                                                                                                           | B 2 <i>a</i> (0.96201,0.31936,0.06623)  |
|                                        |                       |                      |                                                                                                                                           | B 2 <i>a</i> (0.88196,0.13853,0.85647)  |
|                                        |                       |                      |                                                                                                                                           | B 2 <i>a</i> (0.57058,0.13715,0.21969)  |
|                                        |                       |                      |                                                                                                                                           | B 2 <i>a</i> (0.61191,0.82162,0.23853)  |
|                                        |                       |                      |                                                                                                                                           | B 2 <i>a</i> (0.84074,0.97401,0.32316)  |
|                                        |                       |                      |                                                                                                                                           | B 2 <i>a</i> (0.91586,0.76771,0.54251)  |
|                                        |                       |                      |                                                                                                                                           | C 2 <i>a</i> (0.86218,0.14404,0.51885)  |
|                                        |                       |                      |                                                                                                                                           | C 2 <i>a</i> (0.35779,0.73361,0.04503)  |
| C 2 <i>a</i> (0.99374,0.98445,0.08073) |                       |                      |                                                                                                                                           |                                         |
| SrB <sub>8</sub> C <sub>2</sub>        | <i>Pa-3</i>           | 98.2 Å <sup>3</sup>  | $a = b = c = 7.325 \text{ \AA}$<br>$\alpha = \beta = \gamma = 90.0^\circ$                                                                 | Sr 4 <i>a</i> (0,0,0)                   |
|                                        |                       |                      |                                                                                                                                           | B 24 <i>d</i> (0.62818,0.60976,0.43442) |
|                                        |                       |                      |                                                                                                                                           | B 8 <i>c</i> (0.77309,0.77309,0.77309)  |
|                                        |                       |                      |                                                                                                                                           | C 8 <i>c</i> (0.64678,0.64678,0.64678)  |
| SrB <sub>9</sub> C                     | <i>P4/nnc</i>         | 97.6 Å <sup>3</sup>  | $a = b = 5.981 \text{ \AA}$<br>$c = 10.912 \text{ \AA}$<br>$\alpha = \beta = \gamma = 90.0^\circ$                                         | Sr 4 <i>c</i> (0,0.5,0)                 |
|                                        |                       |                      |                                                                                                                                           | B 16 <i>k</i> (0.90284,0.80307,0.18249) |
|                                        |                       |                      |                                                                                                                                           | B 16 <i>k</i> (0.40453,0.30215,0.82196) |
|                                        |                       |                      |                                                                                                                                           | B 4 <i>e</i> (0,0,0.92363)              |
|                                        |                       |                      |                                                                                                                                           | C 4 <i>e</i> (0,0,0.57366)              |

**Table S2** Formation enthalpies of SrB<sub>5</sub>C<sub>5</sub>, SrB<sub>7</sub>C<sub>3</sub>, SrB<sub>8</sub>C<sub>2</sub> and SrB<sub>9</sub>C within different synthesis pathways at 20 GPa.

|                                                | Synthesis pathways                             | $\Delta H$ with respect to diamond carbon (meV/atom) |
|------------------------------------------------|------------------------------------------------|------------------------------------------------------|
| SrB <sub>5</sub> C <sub>5</sub>                | Sr+5B+5C                                       | -16                                                  |
|                                                | SrB+4B+5C                                      | -52                                                  |
|                                                | SrB <sub>2</sub> +3B+5C                        | -129                                                 |
|                                                | SrB <sub>4</sub> +B+5C                         | -197                                                 |
|                                                | SrC <sub>2</sub> +5B+3C                        | -74                                                  |
|                                                | (SrB+SrC <sub>2</sub> +9B+8C)/2                | -127                                                 |
|                                                | (SrB <sub>2</sub> +SrC <sub>2</sub> +8B+8C)/2  | -203                                                 |
|                                                | (SrB <sub>4</sub> +SrC <sub>2</sub> +6B+8C)/2  | -271                                                 |
| (SrB <sub>6</sub> +SrC <sub>2</sub> +8B+8C)/2  | -444                                           |                                                      |
| SrB <sub>7</sub> C <sub>3</sub>                | Sr+7B+3C                                       | -111                                                 |
|                                                | SrB+6B+3C                                      | 43                                                   |
|                                                | SrB <sub>2</sub> +5B+3C                        | -34                                                  |
|                                                | SrB <sub>4</sub> +3B+3C                        | -102                                                 |
|                                                | SrB <sub>6</sub> +B+3C                         | -275                                                 |
|                                                | SrC <sub>2</sub> +7B+C                         | 21                                                   |
|                                                | (SrB+SrC <sub>2</sub> +13B+4C)/2               | 64                                                   |
|                                                | (SrB <sub>2</sub> +SrC <sub>2</sub> +12B+4C)/2 | -13                                                  |
| (SrB <sub>4</sub> +SrC <sub>2</sub> +10B+4C)/2 | -80                                            |                                                      |
| (SrB <sub>6</sub> +SrC <sub>2</sub> +8B+4C)/2  | -254                                           |                                                      |
| SrB <sub>8</sub> C <sub>2</sub>                | Sr+8B+2C                                       | -106                                                 |
|                                                | SrB+7B+2C                                      | 37                                                   |
|                                                | SrB <sub>2</sub> +6B+2C                        | -39                                                  |
|                                                | SrB <sub>4</sub> +4B+2C                        | -107                                                 |
|                                                | SrB <sub>6</sub> +2B+2C                        | -28                                                  |
|                                                | SrC <sub>2</sub> +8B                           | 15                                                   |
|                                                | (SrB+SrC <sub>2</sub> +15B+2C)/2               | 52                                                   |

|                        |                                                      |      |
|------------------------|------------------------------------------------------|------|
|                        | $(\text{SrB}_2+\text{SrC}_2+14\text{B}+2\text{C})/2$ | -24  |
|                        | $(\text{SrB}_4+\text{SrC}_2+12\text{B}+2\text{C})/2$ | -92  |
|                        | $(\text{SrB}_6+\text{SrC}_2+10\text{B}+2\text{C})/2$ | -265 |
|                        | $\text{Sr}+9\text{B}+\text{C}$                       | -95  |
|                        | $\text{SrB}+8\text{B}+\text{C}$                      | 26   |
|                        | $\text{SrB}_2+7\text{B}+\text{C}$                    | -50  |
|                        | $\text{SrB}_4+5\text{B}+\text{C}$                    | -118 |
| $\text{SrB}_9\text{C}$ | $\text{SrB}_6+3\text{B}+\text{C}$                    | -291 |
|                        | $(\text{SrB}+\text{SrC}_2+17\text{B})/2$             | 31   |
|                        | $(\text{SrB}_2+\text{SrC}_2+16\text{B})/2$           | 46   |
|                        | $(\text{SrB}_4+\text{SrC}_2+14\text{B})/2$           | -114 |
|                        | $(\text{SrB}_6+\text{SrC}_2+12\text{B})/2$           | -286 |

## 6. The calculated elastic constants, moduli and Bader charges for SrB<sub>7</sub>C<sub>3</sub>, SrB<sub>8</sub>C<sub>2</sub> and SrB<sub>9</sub>C.

**Table S3** The calculated elastic constants ( $C_{ij}$ ), bulk modulus ( $B$ ), shear modulus ( $G$ ), Young's modulus ( $Y$ ), Pugh ratio ( $G/B$ ) and simulated hardness values ( $H_v$ ) by employing three different empirical model for SrB<sub>7</sub>C<sub>3</sub>, SrB<sub>8</sub>C<sub>2</sub> and SrB<sub>9</sub>C compounds at 20 GPa. The units of  $C_{ij}$ ,  $B$ ,  $G$ ,  $Y$ , and  $H_v$  are GPa.

|                                 |          |          |          |          |          |          |          |                     |                     |                      |
|---------------------------------|----------|----------|----------|----------|----------|----------|----------|---------------------|---------------------|----------------------|
|                                 | $C_{11}$ | $C_{22}$ | $C_{33}$ | $C_{44}$ | $C_{55}$ | $C_{66}$ | $C_{12}$ | $C_{13}$            | $C_{23}$            | $C_{15}$             |
| SrB <sub>7</sub> C <sub>3</sub> | 505.5    | 576.0    | 549.0    | 236.8    | 212.6    | 231.9    | 138.4    | 161.0               | 139.6               | 51.6                 |
|                                 | $C_{25}$ | $C_{35}$ | $C_{46}$ | $B$      | $G$      | $Y$      | $G/B$    | $H_v^{\text{Chen}}$ | $H_v^{\text{Tian}}$ | $H_v^{\text{Teter}}$ |
|                                 | 8.9      | -11.3    | 30.1     | 277.7    | 212.7    | 508.4    | 0.77     | 30.7                | 30.2                | 32.1                 |
| SrB <sub>8</sub> C <sub>2</sub> | $C_{11}$ | $C_{44}$ | $C_{12}$ | $B$      | $G$      | $Y$      | $G/B$    | $H_v^{\text{Chen}}$ | $H_v^{\text{Tian}}$ | $H_v^{\text{Teter}}$ |
|                                 | 497.2    | 206.6    | 140.0    | 259.1    | 194.9    | 467.4    | 0.75     | 28.3                | 27.8                | 29.4                 |
| SrB <sub>9</sub> C              | $C_{11}$ | $C_{33}$ | $C_{44}$ | $C_{66}$ | $C_{12}$ | $C_{13}$ |          |                     |                     |                      |
|                                 | 466.7    | 655.6    | 216.2    | 219.2    | 165.8    | 106.9    |          |                     |                     |                      |
|                                 |          |          |          | $B$      | $G$      | $Y$      | $G/B$    | $H_v^{\text{Chen}}$ | $H_v^{\text{Tian}}$ | $H_v^{\text{Teter}}$ |
|                                 |          |          | 259.7    | 207.7    | 491.9    | 0.80     | 31.9     | 31.2                | 31.4                |                      |

**Table S4** The Bader charges for SrB<sub>7</sub>C<sub>3</sub>, SrB<sub>8</sub>C<sub>2</sub> and SrB<sub>9</sub>C compounds at ambient pressure.

|                                 | Atom | Atom numbers | Charge value ( $e$ ) | $\delta$ ( $e$ ) |
|---------------------------------|------|--------------|----------------------|------------------|
| SrB <sub>7</sub> C <sub>3</sub> | Sr   | 2            | 8.57                 | +1.43            |
|                                 | B    | 14           | 2.25                 | +0.75            |
|                                 | C    | 6            | 6.22                 | -2.22            |
| SrB <sub>8</sub> C <sub>2</sub> | Sr   | 4            | 8.45                 | +1.55            |
|                                 | B    | 32           | 2.57                 | +0.43            |
|                                 | C    | 8            | 6.48                 | -2.47            |
| SrB <sub>9</sub> C              | Sr   | 4            | 8.60                 | +1.40            |
|                                 | B    | 36           | 2.98                 | +0.02            |
|                                 | C    | 4            | 5.59                 | -1.59            |



## 7. The effective mass, elastic constant, DP constant and relaxation time for SrB<sub>8</sub>C<sub>2</sub>.

**Table S5** The corresponding effective mass  $m^*$ , elastic constant  $C$  and DP constant  $E$  at 0 GPa are listed.

| Carrier type | $ m^* /m_0$ | $C$ (eV/Å <sup>3</sup> ) | $ E $ (eV per strain) |
|--------------|-------------|--------------------------|-----------------------|
| Electron     | 0.76        | 10.6                     | 23.94                 |
| Hole         | 1.66        | 10.6                     | 25.55                 |

**Table S6** The carrier relaxation time for the SrB<sub>8</sub>C<sub>2</sub> at 0 GPa.

|                              | 300 K | 400 K | 500 K | 600 K | 700 K | 800 K |
|------------------------------|-------|-------|-------|-------|-------|-------|
| $\tau$ (10 <sup>-14</sup> s) |       |       |       |       |       |       |
| CBM                          | 2.97  | 1.93  | 1.38  | 1.05  | 0.83  | 0.68  |
| VBM                          | 8.41  | 5.46  | 3.91  | 2.98  | 2.36  | 1.93  |

**Table S7** The corresponding effective mass  $m^*$ , elastic constant  $C$  and DP constant  $E$  at 20 GPa are listed.

| Carrier type | $ m^* /m_0$ | $C$ (eV/Å <sup>3</sup> ) | $ E $ (eV per strain) |
|--------------|-------------|--------------------------|-----------------------|
| Electron     | 0.79        | 14.6                     | 25.38                 |
| Hole         | 1.52        | 14.6                     | 27.70                 |

**Table S8** The carrier relaxation time for the SrB<sub>8</sub>C<sub>2</sub> at 20 GPa.

|                              | 300 K | 400 K | 500 K | 600 K | 700 K | 800 K |
|------------------------------|-------|-------|-------|-------|-------|-------|
| $\tau$ (10 <sup>-14</sup> s) |       |       |       |       |       |       |
| CBM                          | 4.17  | 2.71  | 1.94  | 1.47  | 1.17  | 0.96  |
| VBM                          | 9.36  | 6.08  | 4.35  | 3.31  | 2.63  | 2.15  |
